# Supplementary material for: A Comprehensive, Automatically Updated Fungal ITS Sequence Dataset for Reference-Based Chimera Control in Environmental Sequencing Efforts
Source: PubMed Central journal article supplement (PMC4462924; doi:10.1264/jsme2.me14121), 2015-03-19
Supplement: 30_145_s1.pdf [file 30_145_s1.pdf]

This document contains Figs. S1 and S2 of Nilsson et al., "*A comprehensive, automatically updated fungal ITS sequence dataset for reference-based chimera control in environmental sequencing efforts*".

**Fig. S1** (page below). Graphical illustration of problematic sequences with further explanations on how to manually identify compromised sequences.

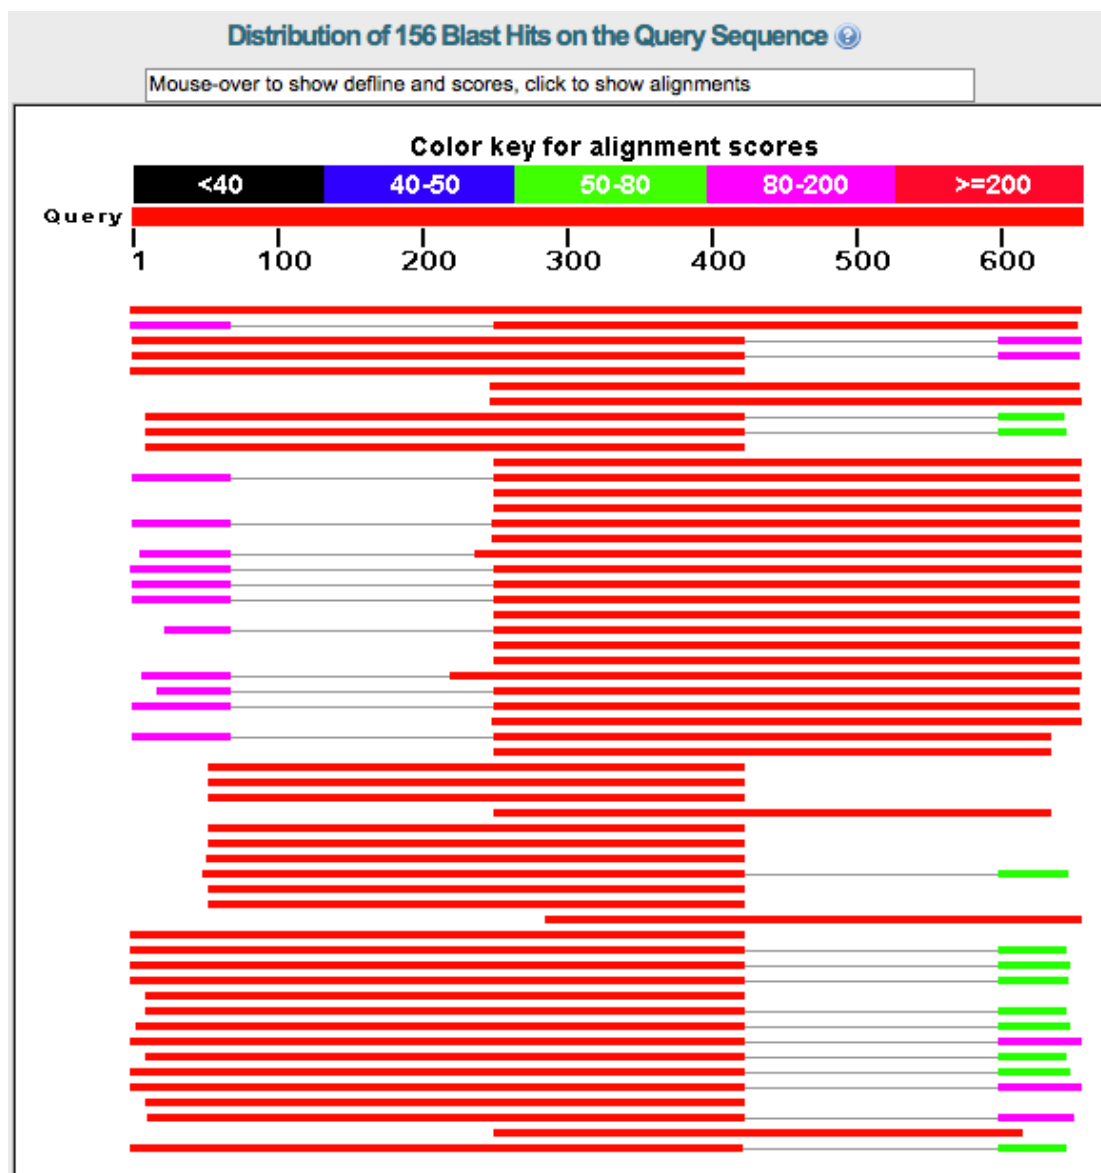

**Figure S1-1a.** Graphical BLAST overview in GenBank of a chimera (JQ272336). The chimera itself was used as query sequence, such that it is both query sequence and its own best BLAST match. The remaining sequences show a very alarming pattern: alternation of matching regions. Either the ITS1-5.8S part matches the query sequence well, or the 5.8S-ITS2 part matches the query sequence well. No non-self GenBank sequence matches the query sequence over its full length. This is never a good sign and should always be taken to mean that manual examination is necessary.

Range 1: 1 to 414 [GenBank](#) [Graphics](#) ▼ Next Match ▲ Previous

| Score         | Expect                                                        | Identities   | Gaps      | Strand    |
|---------------|---------------------------------------------------------------|--------------|-----------|-----------|
| 682 bits(369) | 0.0                                                           | 399/414(96%) | 0/414(0%) | Plus/Plus |
| Query 11      | TTAGAGGAAGTAAAAGTCGTAACAAGGTTTCCGTAGGTGAACCTGCGGAAGGATCATTAT  | 70           |           |           |
| Sbjct 1       | TTAGAGGAAGTAAAAGTCGTAACAAGGTTTCCGTAGGTGAACCTGCGGAAGGATCATTAT  | 60           |           |           |
| Query 71      | CGTACAACAGGAGGTGCCGAGGTTATCGCTGACCCTAGGTCGTGCACGCCTCGAGCATT   | 130          |           |           |
| Sbjct 61      | CGTACAACAGGAGGTGCCGAGGTTGTTCGCTGACCCTAGGTCGTGCACGCCTCGAGCATT  | 120          |           |           |
| Query 131     | TTACTCCTCATCCACTTCACCCCTTGTGCATCCCCCGGTGGGCTCTCTCGAAAGAGAGAG  | 190          |           |           |
| Sbjct 121     | TTACTCCTCATCCACTTCACCCCTTGTGCATCCCCCGGTGGGCTCTCTCGAAAGAGAGAG  | 180          |           |           |
| Query 191     | CCGGCGTCATTACACAAACACAAAGTAGCAGTAGAATGTTCTTTGCATTTGTATGCAGTT  | 250          |           |           |
| Sbjct 181     | CCGGCGTCATTACACAAACACAAAGTAGCAGTAGAATGTTCTTTGCATTTGTATGCAGTT  | 240          |           |           |
| Query 251     | AATACAACCTTTCAGCAACGGATCTCTTGGCTCTCGCATCGATGAAGAACGCAGCGAAATG | 310          |           |           |
| Sbjct 241     | AATACAACCTTTCAGCAACGGATCTCTTGGCTCTCGCATCGATGAAGAACGCAGCGAAATG | 300          |           |           |
| Query 311     | CGATAAGTAATGTGAATTGCAGAATTTCAGTGAATCATCGAATCTTTGAACGCACCTTGCA | 370          |           |           |
| Sbjct 301     | CGATACGTAATGTGAATTGCAGAATTTCAGTGAATCATCGAATCTTTGAACGCACCTTGCG | 360          |           |           |
| Query 371     | CTCCTTGGTATTCGAGGAGTATGCCTGTTTGGAGTGTGCATGAAATCATCAACCT       | 424          |           |           |
| Sbjct 361     | CCCCCTTGGTATTCGGAAGGGCACACCCGTTTGGAGTGTGCATGAAGTTCTCAACCT     | 414          |           |           |

**Figure S1-1b.** Alternation of matching regions as seen from the BLAST alignments (same accession number). Here, it is the ITS2 region that does not match the query sequence well, whereas the first part of the sequence is aligned well over more than 400 bp.

Range 1: 175 to 583 [GenBank](#) [Graphics](#) ▼ Next Match ▲ Previous Match

| Score         | Expect                                                          | Identities   | Gaps      | Strand    |
|---------------|-----------------------------------------------------------------|--------------|-----------|-----------|
| 688 bits(372) | 0.0                                                             | 398/410(97%) | 3/410(0%) | Plus/Plus |
| Query 249     | TTAATACAACCTTTCAGCAACGGATCTCTTGGCTCTCGCATCGATGAAGAACGCAGCGAAA   | 308          |           |           |
| Sbjct 175     | TTAATACAACCTTTCAGCAACGGATCTCTTGGCTCTCGCATCGATGAAGAACGCAGCGAAA   | 234          |           |           |
| Query 309     | TGCGATAAGTAATGTGAATTGCAGAATTTCAGTGAATCATCGAATCTTTGAACGCACCTTG   | 368          |           |           |
| Sbjct 235     | TGCGATAAGTAATGTGAATTGCAGAATTTCAGTGAATCATCGAATCTTTGAACGCACCTTG   | 294          |           |           |
| Query 369     | CACTCCTTGGTATTCCGAGGAGTATGCCTGTTTGGAGTGTGCATGAAATCATCAACCTCATA  | 428          |           |           |
| Sbjct 295     | CACTCCTTGGCATTCCGAGGAGTATGCCTGTTTGGAGTGTGCATGAAATTCCTCAACCTCATA | 354          |           |           |
| Query 429     | GTTTTATTACCC-TGAGGCTTGGACTTGGAAAGCTGCTGGCTTATGTCGGCTCTTCTTAAA   | 487          |           |           |
| Sbjct 355     | GTTTTATTACTCTTGGAGCTTGGATTGGAAAGCTGCTGGCTAATGTCGGCTCTTCTTAAA    | 414          |           |           |
| Query 488     | TATATTAGCTGCTTGTCCGTGAGTTGGCTCAGAGTGTGATAAGTATCTACACTTGGTGGC    | 547          |           |           |
| Sbjct 415     | TGTATTAGCTGCTTGTCCGTGAGTTGGCTCAGAGTGTGATAAGTATCTACACTTGGTGGC    | 474          |           |           |
| Query 548     | TGCTCGCATTTGGATGTGGCTTCTAAT-CGTCTTCGGACAATTTTTAAGATCTGACCTCA    | 606          |           |           |
| Sbjct 475     | TGCTTGCATTTGGATGTGGCTTCTAATCCGCTTCGGACAAC-TTTTAAGATCTGACCTCA    | 533          |           |           |
| Query 607     | AATCAGGTAGGACTACCCGCTGAACTTAAGCATATCAATAAGCGGAGGAA              | 656          |           |           |
| Sbjct 534     | AATCAGGTAGGACTACCCGCTGAACTTAAGCATATCAATAAGCGGAGGAA              | 583          |           |           |

**Figure S1-1c.** A few entries down the list (same accession number), it is the ITS1 of the query sequence that does not match the reference sequence well (no

alignment produced between the query and the subject for the first few hundred base-pairs). This bespeaks a 5.8S-based chimeric union. We recommend examining the BLAST alignment to learn of the specifics of each putative chimera. In cases where the graphical summary is not as clear-cut as above (and indeed when the graphical summary does not indicate any problem at all), the BLAST alignment is the best source for further examination.

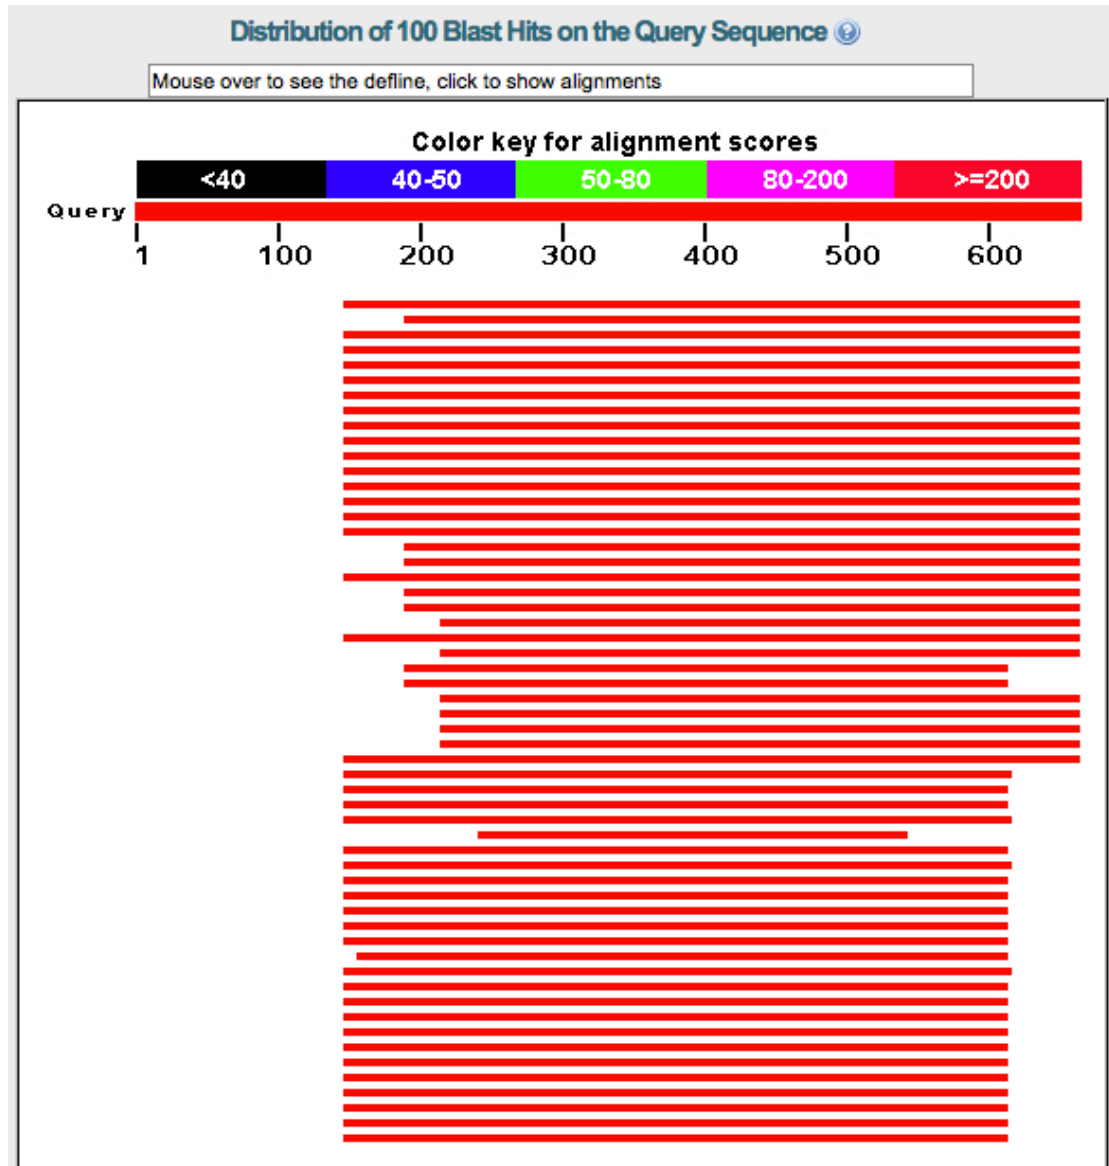

**Figure S1-2.** Entry JN035638 shows a very alarming pattern: a complete lack of matches for the first part of the query sequence. This is not to be expected for a high-quality fungal ITS sequence, and manual examination of the BLAST results are always needed in these cases. BLAST:ing the first part of the sequence separately is one way forward, as is examining the first part of the query sequence for indications of low read quality.

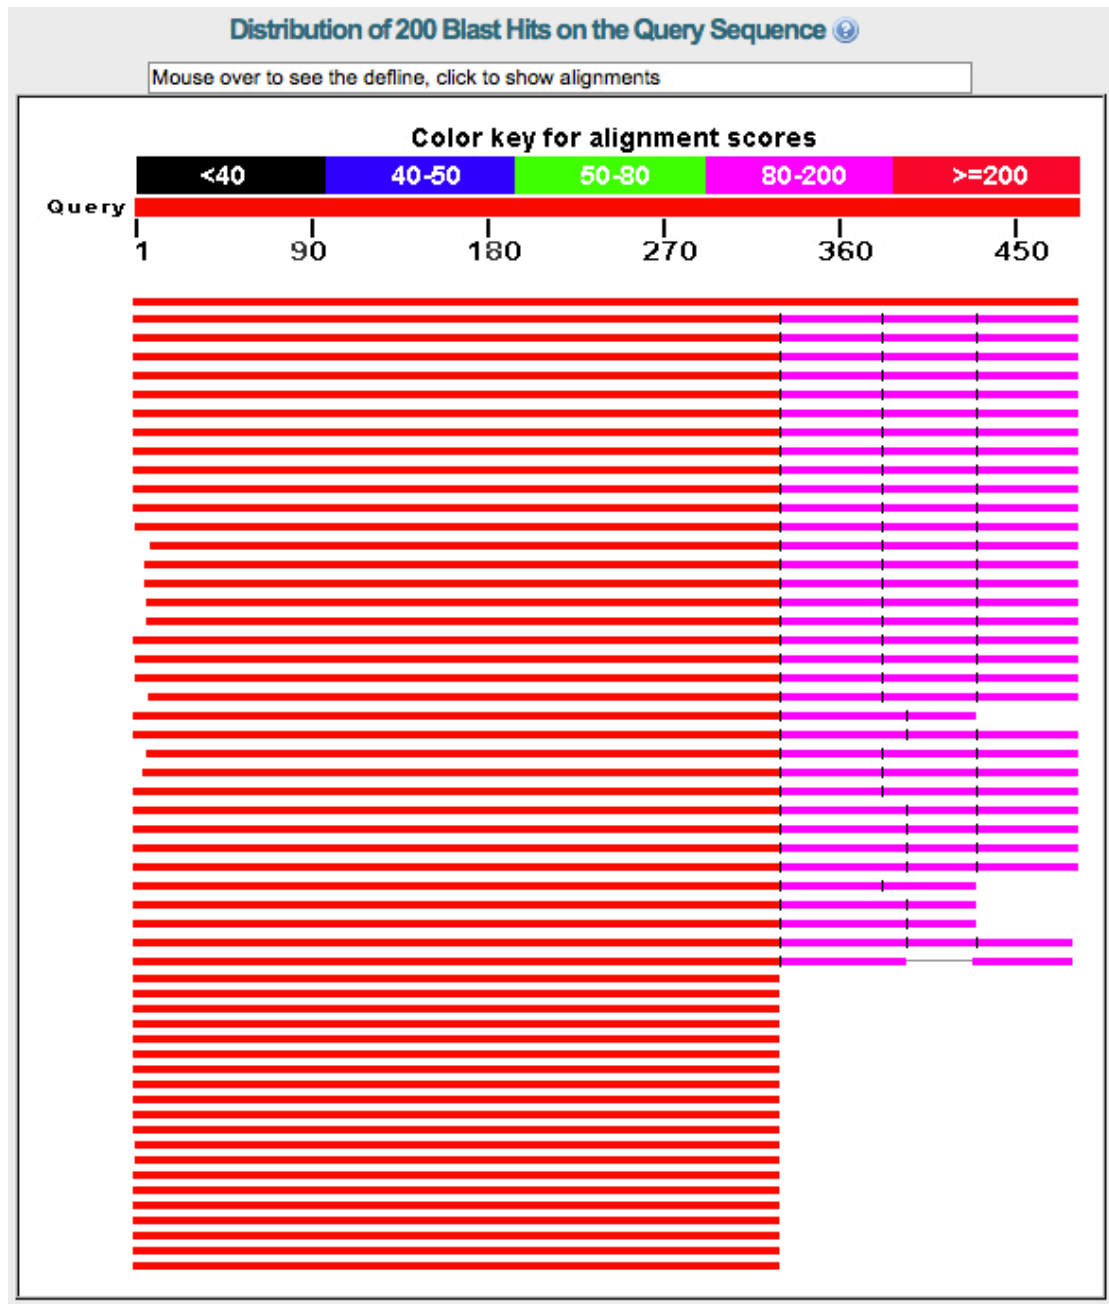

**Figure S1-3.** Entry FM180040 shows another alarming pattern: breaks in the BLAST alignment. This typically means that the BLAST results cannot be shown in a straightforward way, such as when a sequence was assembled incorrectly. Assembly chimeras produce BLAST results like this.

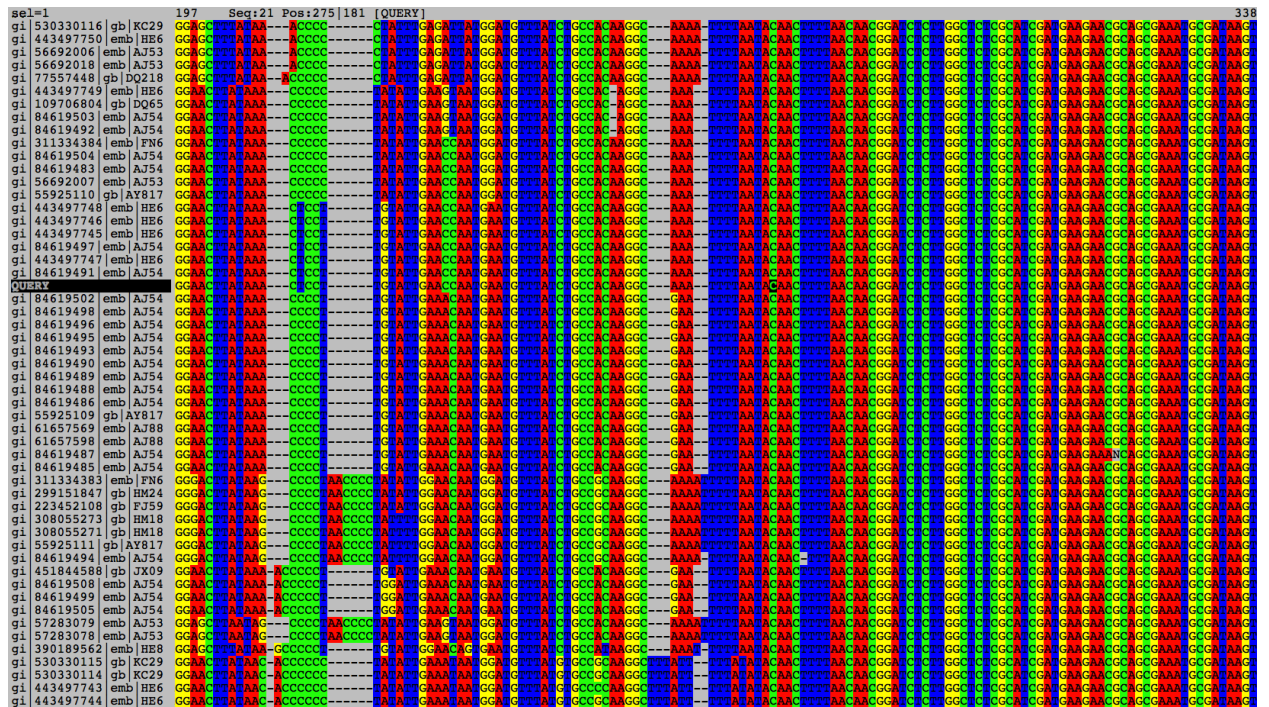

**Figure S1-4a.** The sequence QUERY (highlighted) is chimeric. The sequence aligns perfectly in the ITS1 and the first part of the 5.8S – the screenshot shows the last part of the ITS1 and the first part of the 5.8S. The cursor approximately in the middle of the screen indicates the first base-pair of the 5.8S. The sequences come from the genus *Hydnum*.

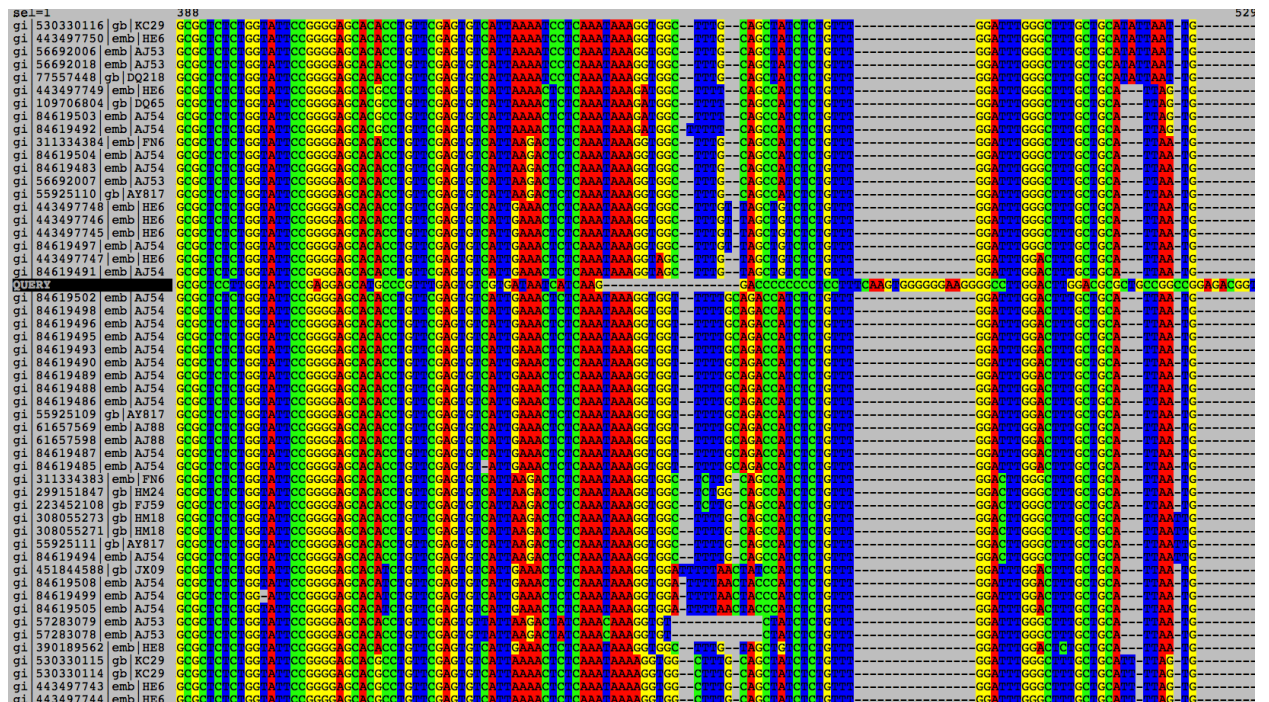

**Figure S1-4b.** However, as one scrolls through the 5.8S gene, the chimeric nature of the entry QUERY becomes evident. This screenshot shows the last base-pairs of the 5.8S and the start of ITS2. A separate BLAST search of the ITS2

Nilsson et al. Fig. S1

shows it to belong to a *Botryobasidium* species (same order as *Hydnum*, but a different family). The alignment was computed in MAFFT and displayed in SeaView.

**ITS Primer Maps** – ITS primer maps are available at

<https://unite.ut.ee/primers.php>,

<http://sites.biology.duke.edu/fungi/mycolab/primers.htm>, and

<http://lutzonilab.org/nuclear-ribosomal-dna/>

**Fig. S2.** Screenshot showing how potentially chimeric sequences are indicated in UNITE through the use of UCHIME.

**Plot of**  
Cloud database and computing services for the biologist
You are logged in as hnilsson  
[Log out here](#)

Main menu

Add taxon occurrence

Add

Search and edit

Add and edit taxon names

UNITE Species Hypotheses

Clipboard

Workgroups



NATARC



**Annotated by Kessy Abarenkov**

Accession number **GU910393** (578 bp) [Belongs to GlobalKey cluster](#)

Study info  
environmental sequence from [Herrera, J., Poudel, R. and Khidir, H.H.](#); Characterization of coprophilous fungi using molecular techniques; Unpublished, South Dakota

[Link to another plot ?](#)  
[Link to specimen ?](#)  
[Create new plot and sample ?](#)

Sequence type ITS1 - 5.8S - ITS2

**Determinations**

No determinations added.

*Last modified by: Kessy Abarenkov, 2011-05-06 00:15:17*

[Edit sequence](#) [Add determination](#) [Attach file](#) [Create duplicate](#)

**UCHIME warning**

(!) This entry is potentially chimeric (UCHIME score = 19.7545). Putative parent sequences are: [GU910321](#) and [EU551188](#).

**Original data from INSD**

```

/organism="uncultured Sordariales" (Sordariales)
Eukaryota; Fungi; Dikarya; Ascomycota; Pezizomycotina; Sordariomycetes; Sordariomycetidae;
Sordariales; environmental samples.
/country="USA: South Dakota" (United States of America)
/host="prairie dog" (taxon: unspecified)
/isolation_source="dung"
/clone="8WE3cb03"
/sequence=
GACAGCGGAGGGACATTAAGAGTTATCTAATTCACAAACCATGTGAACCTACCTATGTTGCCTCGGGGGGAAC
CTACTCGGGGAGCCACTAGAGTGGCTACCCGGTACCTACTCGGTAACACTACTGATGTTGAGGCTTACCCG
CCGGGGACATTAACACTTATTATTTGGCACTCTGAATATTATCATAATAGTTAAACATTTCAACAA
CGGATCTCTGGTCTGGCATCGATTGAAGAACGACGAAATGCGATAAGTAAATGGAATGCGAATTCAGTGA
ATCATCGAATCTTTGAACGACATTCGCTCGCCAGTATTCTGGCGAGCATGCCTGTTGAGCGCTATTCAACC
ATCAAGCTCTGCTTGGTTGGGATCCGGCTCTGACGGGTCCCTCAAAAACAGTGGGGGGCTCGCTAGTCACAC
CGAGCGTAGTAACCTACATCGCTATGGTCGTGGCGGGTCTTGGCGTAAACCCCAATTTCTAAGTTGAC
CTCGGATCAGGTAGGAATACCCGCTGAACCTAAGCATATCAATAAGCGGAGGA
                    
```

(!) Sequence updated in INSD since its first download. Current study name="Herrera, J., Poudel, R. and Khidir, H.H."; Molecular characterization of coprophilous fungal communities reveals sequences related to root-associated fungal endophytes; Microb. Ecol. 61 (2), 239-244 (2011)"

*Inserted by: Kessy Abarenkov, 2011-04-28*

[Back to search](#)

Last updated: 2013-10-26. Webmaster: [kessy.abarenkov\[at\]ut.ee](mailto:kessy.abarenkov[at]ut.ee)
There are 6 users logged in at the moment.
